# Supplementary material
Source: PubMed Central journal article supplement (PMC6766657)

## Supplemental Material - Salizzato et al.

### Supplemental Figure Legends

**Figure S1.** Densitometric quantification of the immunostained protein bands shown in Fig. 1 and analysis of CK2 activity in WT and knockout C2C12 myoblasts. (A) Densitometric quantification of CK2 $\alpha$ , CK2 $\alpha'$  and CK2 $\beta$  protein amount in WT and knockout C2C12 myoblasts from immunostained bands obtained as in Fig. 1A, normalized to  $\beta$ -actin and relative to WT cells ( $n = 8$  independent experiments; mean values  $\pm$  SEM).  $*P < 0.05$ ,  $***P < 0.0001$ . (B) Phosphorylation extent of Akt1 Ser129 (p-Akt1 S129) quantified as the ratio of p-Akt1 Ser129/Akt1 immunostained bands obtained as in Fig. 1A and relative to WT cells ( $n = 8$  independent experiments; mean values  $\pm$  SEM).  $***P < 0.0001$ . (C) CK2 kinase activity assayed *in vitro* towards the eIF2 $\beta$ (1-22) peptide-substrate in the cellular lysates of WT and knockout C2C12 myoblasts. Data are presented as percentage relative to WT myoblasts ( $n = 4$  independent experiments; mean values  $\pm$  SEM).  $**P < 0.01$ ,  $***P < 0.0001$ . (D) Densitometric quantification of immunostained bands obtained as in Fig. 1D. Values are expressed relative to 2 d scrambled siRNA-treated (left panel) or 6 d scrambled siRNA- vehicle-treated (right panel) cells ( $n = 5$  independent experiments at 2 d,  $n = 3$  independent experiments at 6 d; mean values  $\pm$  SEM).  $***P < 0.0001$ . (E) Densitometric quantification of immunostained bands obtained as in Fig. 1E. Values are expressed relative to vehicle-treated cells ( $n = 4$  independent experiments; mean values  $\pm$  SEM).  $***P < 0.0001$ .

**Figure S2.** Distribution of AchR clusters, quantification of the immunostained bands of Fig. 2B and D, comparison of CK2 tetramer amount in proliferating and differentiating WT cells and detection of CK2 kinase activity in WT and knockout C2C12 cells. (A) Representative confocal images of acetylcholine receptor (AchR) clustering in WT and knockout C2C12 myoblasts at 6 d of differentiation, stained with Alexa 555-conjugated Bungarotoxin (BTX) without (left images) or with (right images, Merge) light illumination to detect cell shape. ( $n = 3$  independent experiments). Scale bar = 10  $\mu$ m. (B) Densitometric quantification of the CK2 $\alpha$ , CK2 $\alpha'$ , CK2 $\beta$  and MyoD protein amount in differentiating WT and knockout cells from immunostained bands obtained as in Fig. 2B and D at the indicated time points, normalized to  $\beta$ -actin and relative to WT proliferating (0 d) cells ( $n = 5$  independent experiments; mean values  $\pm$  SEM). (C) Representative immunoblotting of CK2 $\alpha$ , CK2 $\alpha'$  or CK2 $\beta$  immunoprecipitates from proliferating (0 d) or differentiated (6 d) WT C2C12 cells ( $n = 4$ ). (D) Phosphorylation of Akt1 Ser129 (p-Akt1 S129) quantified as the ratio of p-Akt1 Ser129/Akt1 immunostained bands obtained as in Fig. 2D ( $n = 5$  independent experiments; mean values  $\pm$  SEM). (E) CK2 kinase activity assayed *in vitro* using the eIF2 $\beta$ (1-22) peptide-substrate in

the cellular lysates of differentiating WT and knockout C2C12 cells. Data are percentage relative to WT proliferating (0 d) myoblasts ( $n = 4$  independent experiments; mean values  $\pm$  SEM). (B, D, E) Statistical significance for knockout cells *versus* WT cells was calculated at each time point by two-way ANOVA, followed by Bonferroni's multiple comparison test  $^{\#}P < 0.05$ ,  $^{\#\#}P < 0.01$ ,  $^{\#\#\#}P < 0.001$ . Two-tailed Student's t-test was used to assess the statistical significance of differentiating *versus* proliferating cells (0 d).  $^{**}P < 0.01$ ,  $^{***}P < 0.0001$ .

**Figure S3.** Analysis of cell migration, cytoskeletal remodeling and fusogenic protein translocation in WT and CK2 $\alpha^{7/-}$  C2C12 cells. (A) Representative images of cell migration assessed by wound healing assay in proliferating WT or CK2 $\alpha^{7/-}$  C2C12 cells at 0, 14 and 18 h ( $n = 3$ ). (B) Cell migration was quantified in images obtained as in A by measuring the scratch-area covered by cells at the indicated time point and expressed as the percentage of the scratch-area at 0 h. (C) Representative confocal images of proliferating WT or CK2 $\alpha^{7/-}$  C2C12 cells stained with phalloidin (red) or  $\alpha$ -tubulin antibody (green) ( $n = 4$  independent experiments). (D) Densitometric quantification of caveolin-3 and myomixer protein amount in the plasma membrane fraction (PM) of differentiating WT or CK2 $\alpha^{7/-}$  cells. Values, acquired from the immunostained bands obtained as in Fig. 2I, were normalized to the plasma membrane Ca $^{2+}$  ATPase (PMCA) bands and relative to WT cells. ( $n = 4$  independent experiments; mean values  $\pm$  SEM).  $^{***}P < 0.0001$ .

**Figure S4.** Dose- and time-dependent inhibition of C2C12 myoblast differentiation, muscle-specific protein expression and fusogenic protein translocation by CX-5011. (A-D) WT C2C12 cells, differentiated for 6 d in the presence of vehicle or the indicated concentrations of CX-5011, were lysed and lysate proteins were analyzed. (A) Immunoblotting analysis with the indicated antibodies.  $\beta$ -actin was used as loading control. ( $n = 3$  independent experiments). (B) CK2 kinase activity assayed *in vitro* using the eIF2 $\beta$ (1-22) peptide-substrate. Data are expressed as percentage relative to vehicle-treated cells ( $n = 3$  independent experiments; mean values  $\pm$  SEM).  $^{***}P < 0.0001$ . (C) Cell viability measured by MTT assay of C2C12 cells at 6 d of differentiation. Data are expressed as percentage relative to vehicle-treated cells ( $n = 3$  independent experiments; mean values  $\pm$  SEM). (D) Cellular morphology assessed by bright field microscopy ( $n = 3$  independent experiments). (E) Densitometric quantification of CK2 $\alpha$ , CK2 $\alpha'$  and CK2 $\beta$  protein amount from immunostained bands obtained as in Fig. 3A and normalized to  $\beta$ -actin ( $n = 5$  independent experiments; mean values  $\pm$  SEM).  $^{*}P < 0.05$ ,  $^{***}P < 0.0001$  *versus* vehicle-treated cells at 2 h. (F) Phosphorylation of Akt1 Ser129 (p-Akt1 S129) quantified as the ratio of p-Akt1 Ser129/Akt1 immunostained bands obtained as in Fig. 3A ( $n = 5$  independent experiments; mean values  $\pm$  SEM).  $^{**}P < 0.01$ ,  $^{***}P < 0.001$  *versus*

vehicle-treated cells at 2 h. (G) CK2 kinase activity of cellular lysates from vehicle- or CX-5011-treated differentiating C2C12 myoblasts, assayed *in vitro* using the eIF2 $\beta$ (1-22) peptide-substrate. Data are percentage of vehicle-treated cells at 2 h ( $n = 3$  independent experiments; mean values  $\pm$  SEM). \*\*\* $P < 0.0001$ . (H) Densitometric quantification of muscle differentiation marker protein amount from immunostained bands obtained as in Fig. 3C, normalized to  $\beta$ -actin and expressed relative to vehicle-treated cells at 3 d ( $n = 5$  independent experiments; mean values  $\pm$  SEM). \* $P < 0.05$ , \*\* $P < 0.01$ , \*\*\* $P < 0.0001$  for CX-5011- versus vehicle-treated cells at each time point. (I) Densitometric quantification of MyoD and myogenin protein amount from immunostained bands obtained as in Fig. 3C, normalized to  $\beta$ -actin and expressed relative to vehicle-treated C2C12 cells at 2 h ( $n = 5$  independent experiments; mean values  $\pm$  SEM). (J) Densitometric quantification of caveolin-3 and myomixer protein amount in the plasma membrane fraction (PM) of differentiating WT cells treated with vehicle or 2  $\mu$ M CX-5011 at 4 d. Values, acquired from the immunostained bands obtained as in Fig. 3J, were normalized to the plasma membrane Ca<sup>2+</sup> ATPase (PMCA) bands and relative to vehicle-treated cells. ( $n = 4$  independent experiments; mean values  $\pm$  SEM). \*\*\* $P < 0.0001$ . (K) Cellular morphology assessed by bright field microscopy of differentiating C2C12 cells in the presence of vehicle or 2  $\mu$ M CX-5011 for the indicated time windows and analyzed at 6 d. In the case of CX-5011-treatment for the first day (0-1 d), the medium was replaced after 1 d with the conditioned medium of vehicle-treated C2C12 cells at 1 d of differentiation.

**Figure S5.** Inhibition of CK2 activity impairs CK2 $\alpha$ <sup>-/-</sup> C2C12 cell differentiation. CK2 $\alpha$ <sup>-/-</sup> C2C12 cells were differentiated in the presence of vehicle or 2  $\mu$ M CX-5011 and analyzed at 6 d of differentiation. (A) Cellular morphology assessed by bright field microscopy ( $n = 3$  independent experiments). Scale bar, 200  $\mu$ m. (B) Immunoblotting analysis of cellular lysates with the indicated antibodies.  $\beta$ -actin was used as loading control ( $n = 3$  independent experiments). (C) Densitometric quantification of the immunostained bands obtained as in B, normalized to  $\beta$ -actin and expressed relative to vehicle-treated cells ( $n = 3$  independent experiments; mean values  $\pm$  SEM). \*\*\* $P < 0.0001$ .

**Figure S6.** Inhibition of CK2 activity impairs the expression of myogenic markers and myoblast fusion in regenerating mouse muscle and developing zebrafish embryo. Overexpression of CK2 $\alpha$ ' stimulates C2C12 cell fusion. (A) Densitometric quantification of the immunostained bands obtained as in Fig. 5B, normalized to  $\beta$ -actin and expressed relative to vehicle-treated muscles ( $n = 7$  mice; mean values  $\pm$  SEM). \*\*\* $P < 0.0001$ . (B) Representative bright field images of hematoxylin and eosin staining of transversal cryosections from regenerating mouse tibialis anterior (TA) muscles

treated with vehicle or CX-5011 at the indicated time points after cardiotoxin injury. Scale bar, 50  $\mu\text{m}$ . (C) Representative images of TA muscle sections immunostained with anti-Pax7 or anti-MyoD (red) and anti-laminin (green) antibodies at 4 d of regeneration. Hoechst (blue) stains nuclei ( $n = 4$  mice). Scale bar, 10  $\mu\text{m}$ . (D) Densitometric quantification of the immunostained bands obtained as in Fig. 5J, normalized to  $\beta$ -actin and expressed relative to empty vector-transfected muscles ( $n = 3$  mice; mean values  $\pm$  SEM).  $***P < 0.0001$ . (E) Immunofluorescence of C2C12 cells co-transfected with pEGFP-N1 + pcDNA3.1 (empty) or pEGFP-N1 + pRcCMV2-CK2 $\alpha'$ -HA (CK2 $\alpha'$ ) plasmids and stained with anti-troponin T antibody (green) at 2 d of differentiation. Transfected cells are identified by GFP fluorescence pseudo-colored in red. Hoechst (blue) stains nuclei ( $n = 3$ ). Scale bar, 10  $\mu\text{m}$ . (F) Quantification of mononucleated GFP- and troponin T-double positive cell number from images obtained as in E, expressed as percentage over the total GFP- and troponin T-double positive cells ( $n = 3$ ; mean values  $\pm$  SEM).  $***P < 0.0001$ . (G) Fusion index, defined as the percentage of nuclei present in transfected GFP- and troponin T-double positive myotubes over the total number of nuclei of transfected cells in images as in E, where cells containing at least 3 nuclei are considered myotubes ( $n = 3$ ; mean values  $\pm$  SEM).  $***P < 0.0001$ . (H) Representative confocal images showing the lateral view (anterior to the left) of 48 hpf zebrafish tail somites, immunostained for fast fiber-type-specific myosin (F310 antibody, green) and counterstained with Hoechst (blue) to detect nuclei. Scale bar, 10  $\mu\text{m}$ . (I) Fiber myonuclei content in 48 hpf zebrafish embryo tail somites measured in images obtained as in H. Data are presented as percentage of fibers with the indicated number of nuclei over the total number of fibers considered ( $n = 354$  fibers from vehicle-treated and  $n = 314$  fibers from CX-5011-treated embryos, mean values  $\pm$  SEM).  $***P < 0.0001$  versus fibers from vehicle-treated embryos. (J) Representative confocal images showing the lateral view (anterior to the left) of 96 hpf zebrafish tail somites, immunostained for fast fiber-type-specific myosin (F310 antibody, green) and counterstained with Hoechst (blue) to detect nuclei. Scale bar, 10  $\mu\text{m}$ . (K) Fiber myonuclei content in 96 hpf zebrafish embryo tail somites measured in images obtained as in J. Data are presented as percentage of fibers with the indicated number of nuclei over the total number of fibers considered ( $n = 329$  fibers from vehicle-treated and  $n = 370$  fibers from CX-5011-treated embryos, mean values  $\pm$  SEM).  $***P < 0.0001$  versus fibers from vehicle-treated embryos.

## Supplemental Figures

**Fig. S1**

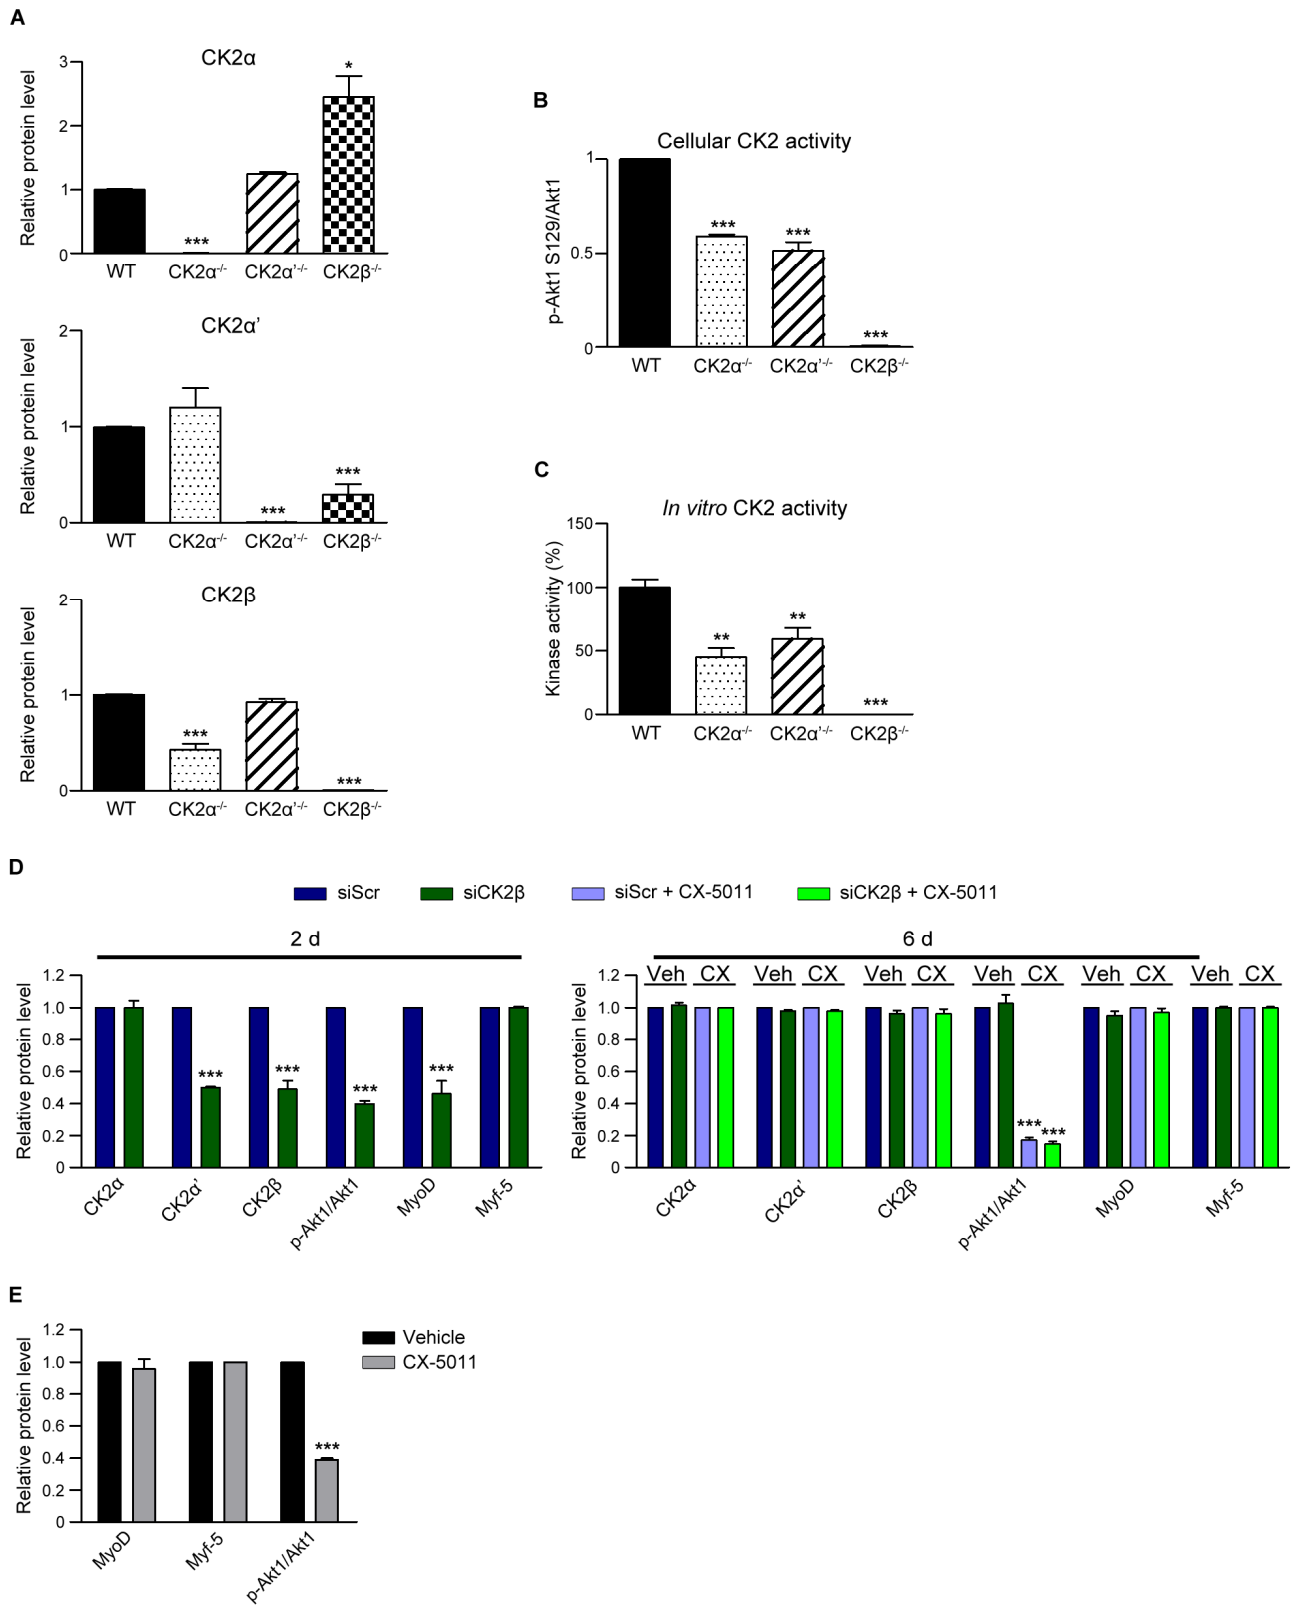

**Fig. S2**

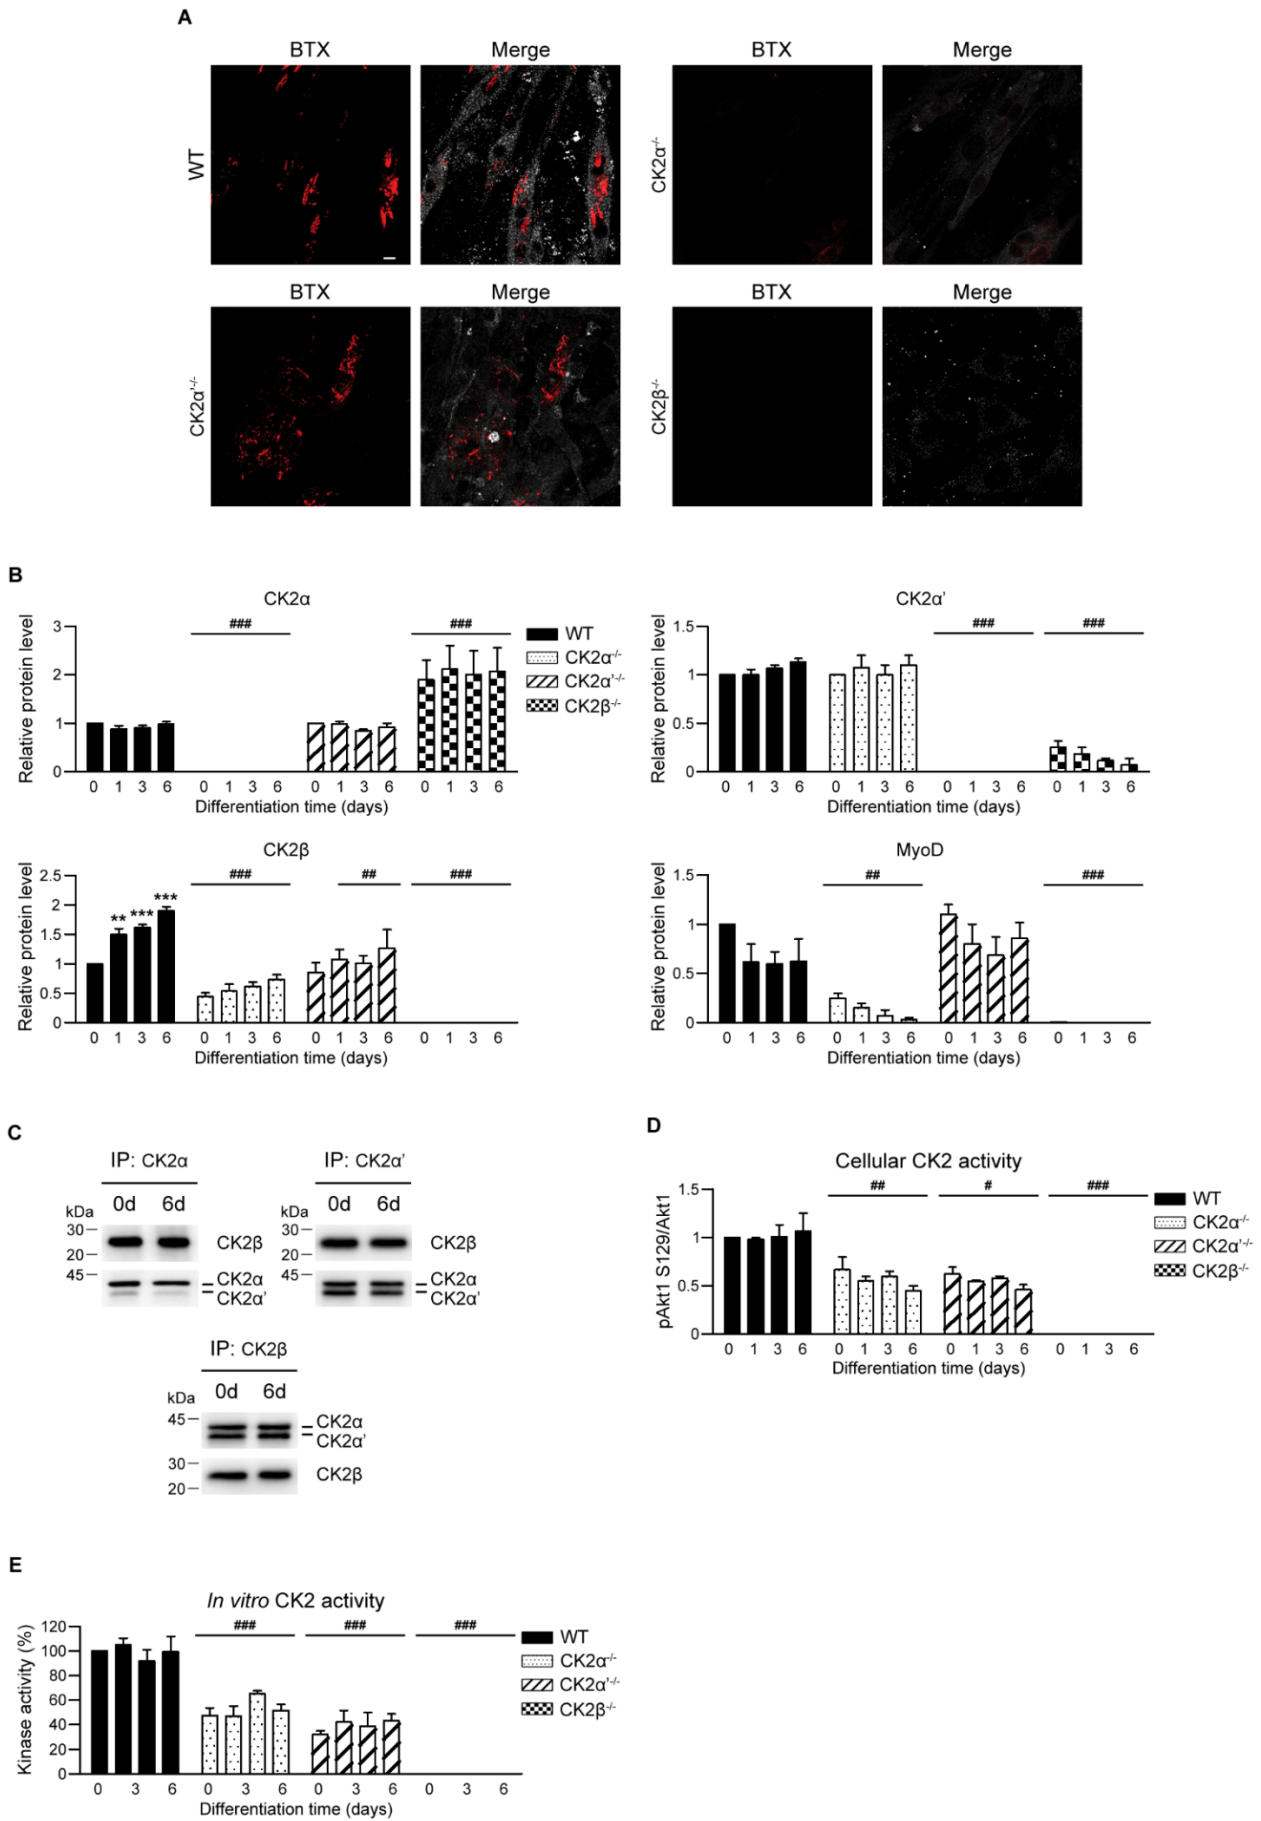

**Fig. S3**

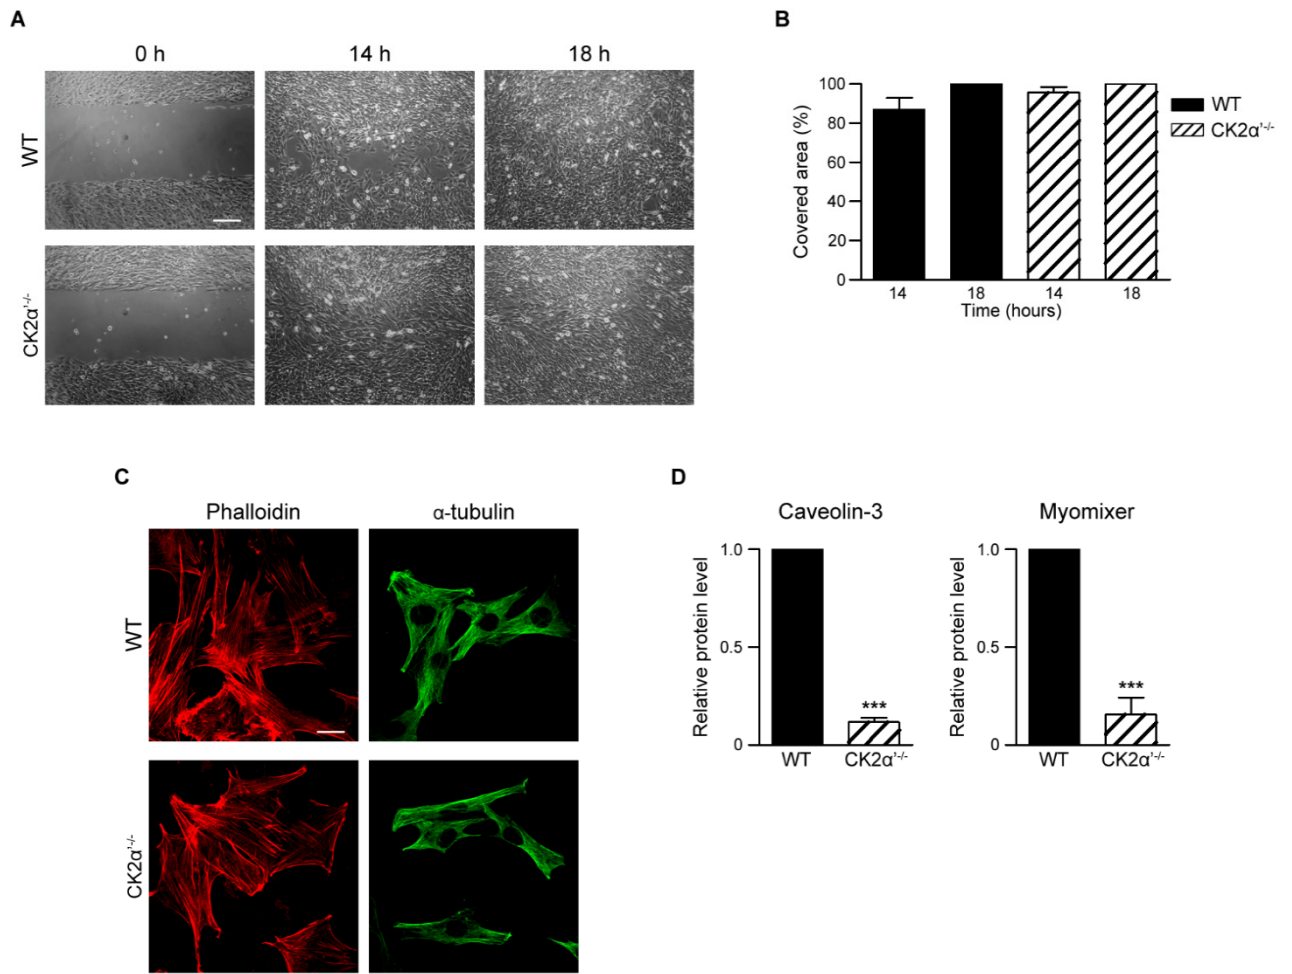

**Fig. S4**

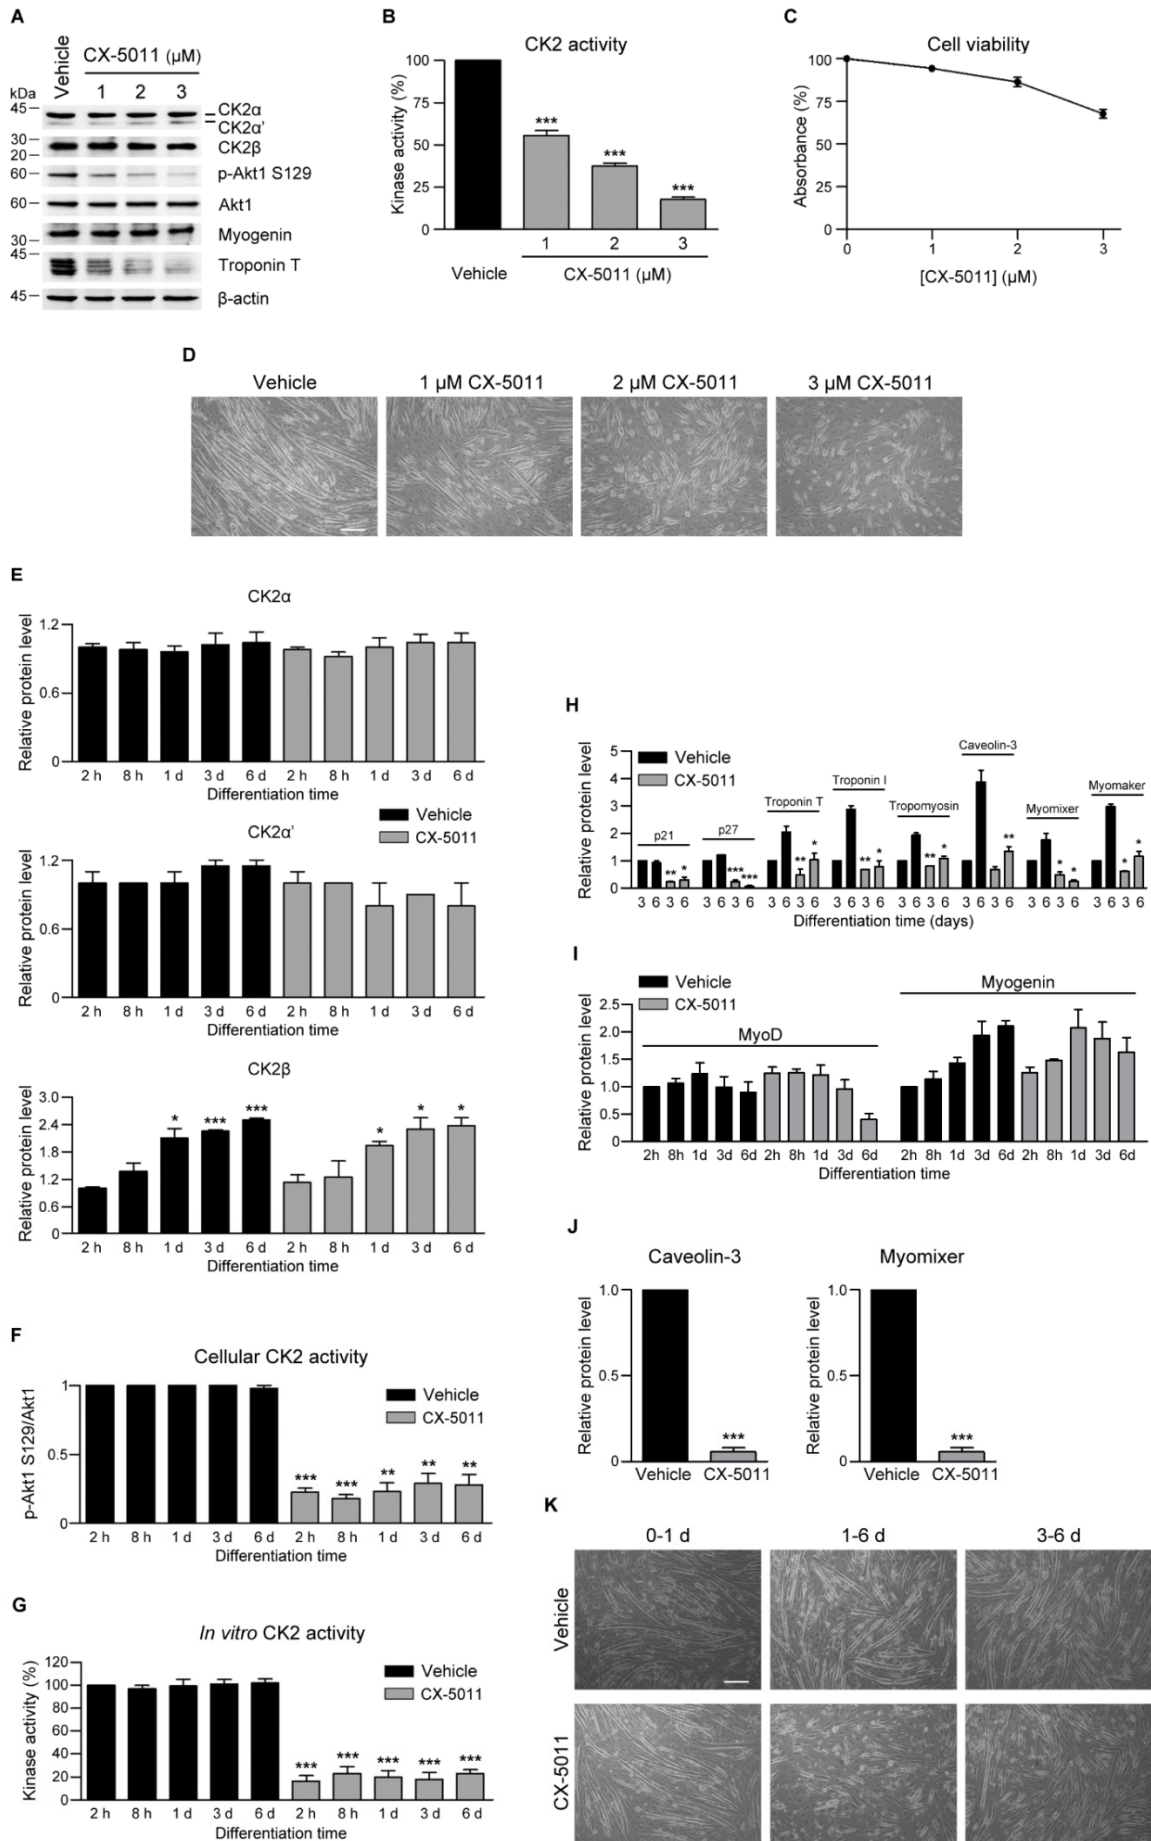



**Fig. S5**

**A**

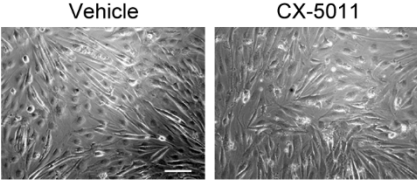

**B**

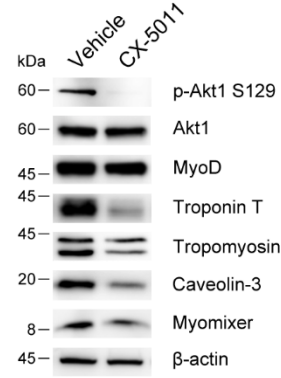

**C**

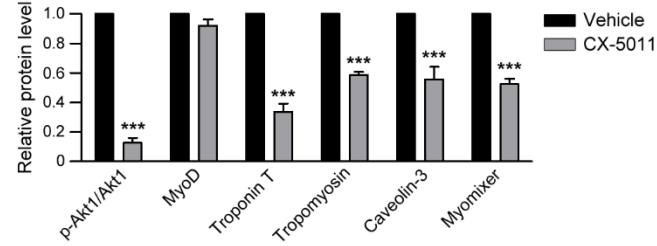

**Fig.S6**

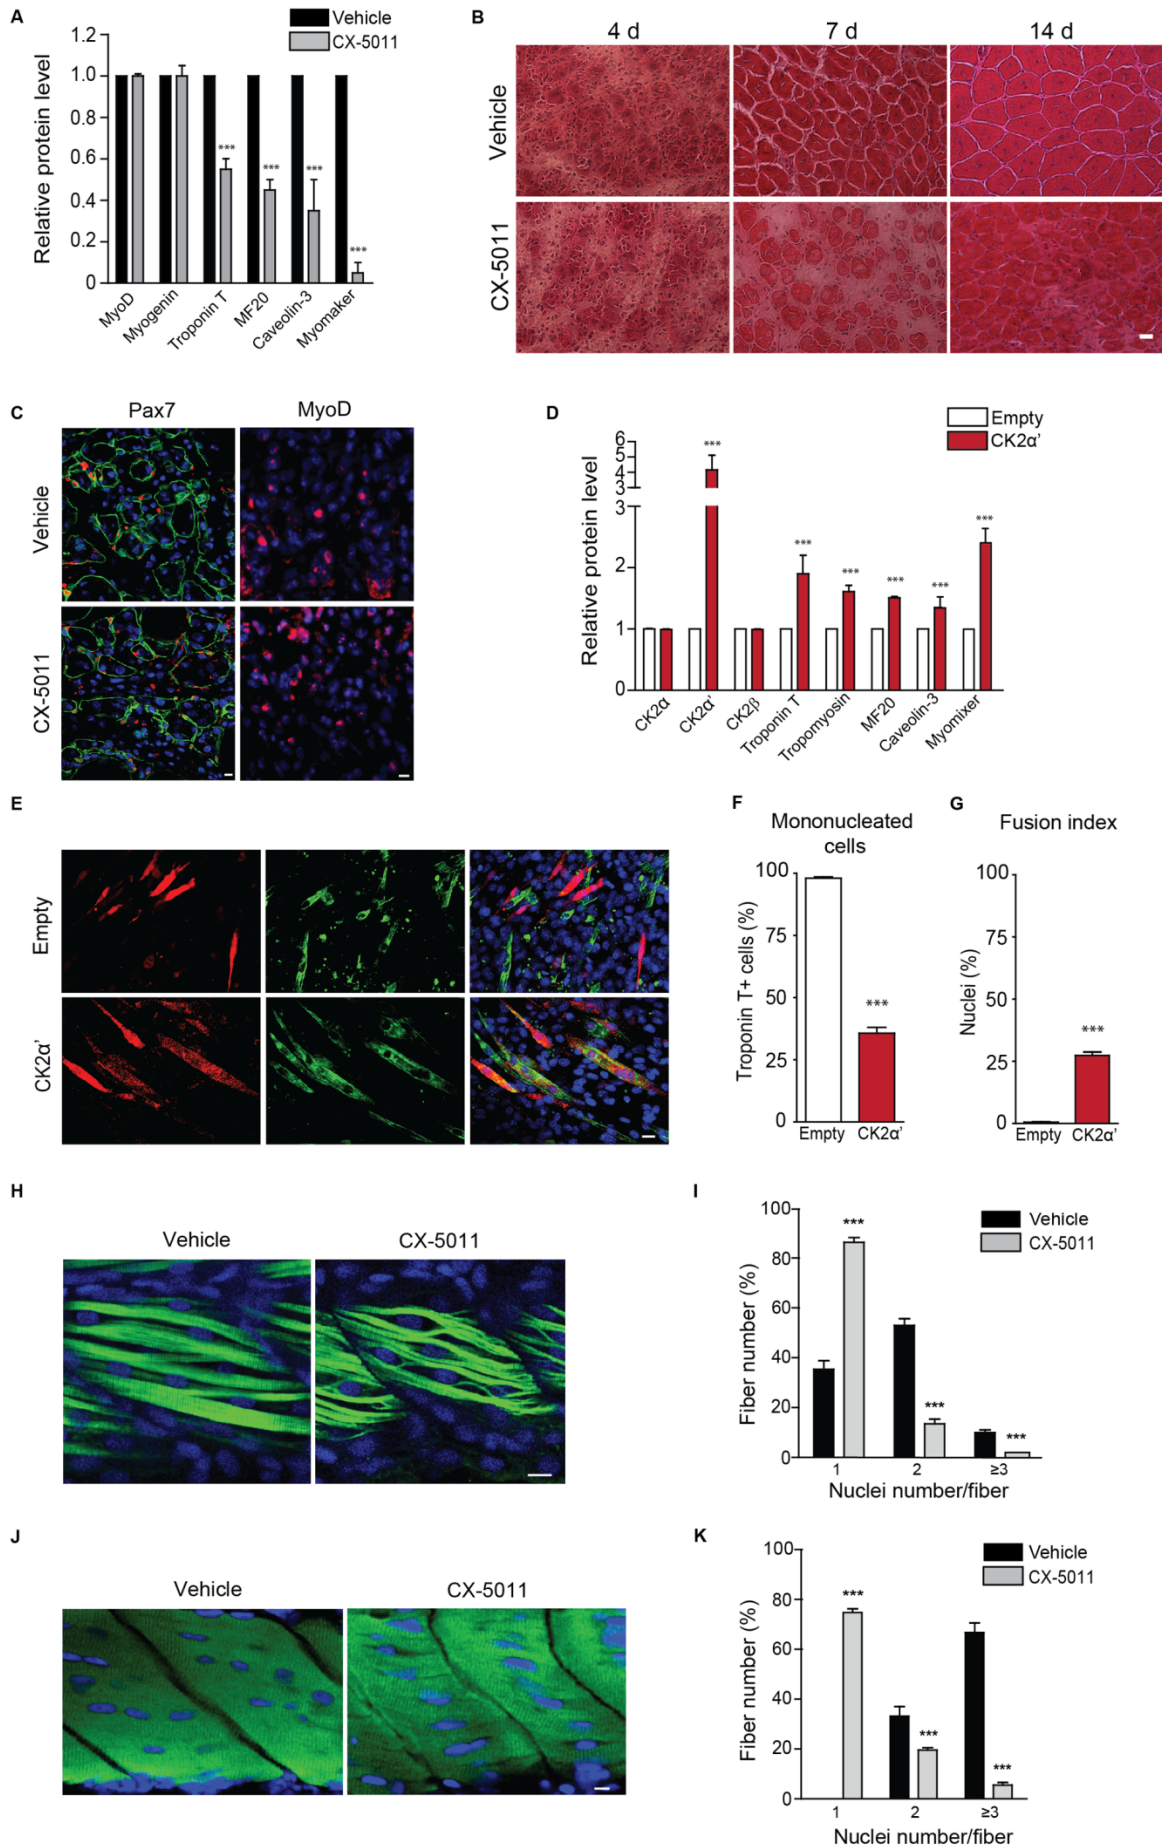

Supplement: fj.201801833RR.sf1.pdf [file fj.201801833RR.sf1.pdf]
